# Supplementary material for: A Case-Only Genome-Wide Interaction Study of Smoking and Bladder Cancer Risk: Results from the COBLAnCE Cohort
Source: MDPI journal article supplement (doi:10.3390/cancers15174218), 2023-08-23
Supplement: s1 [file s1]

Chromosome 1

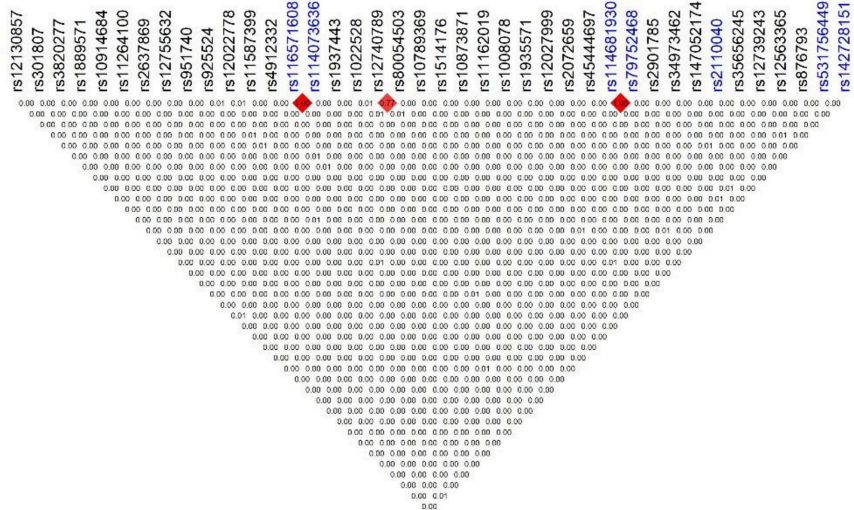

Chromosome 3

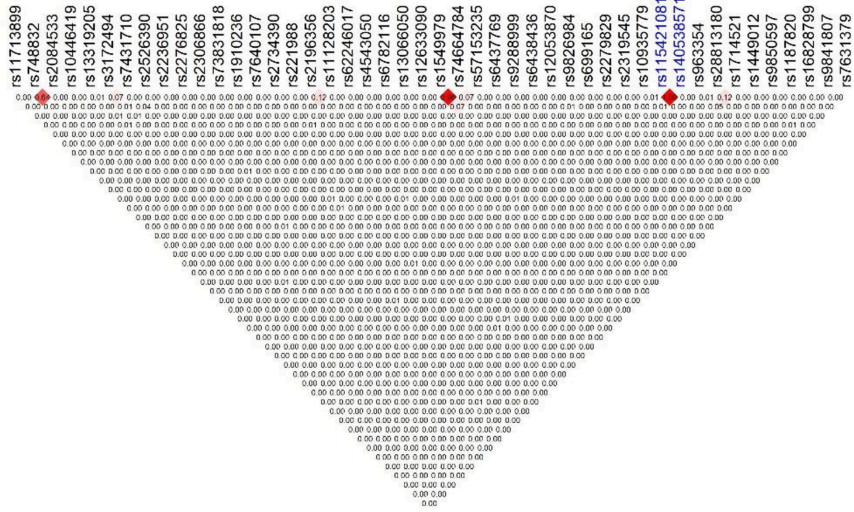

Chromosome 2

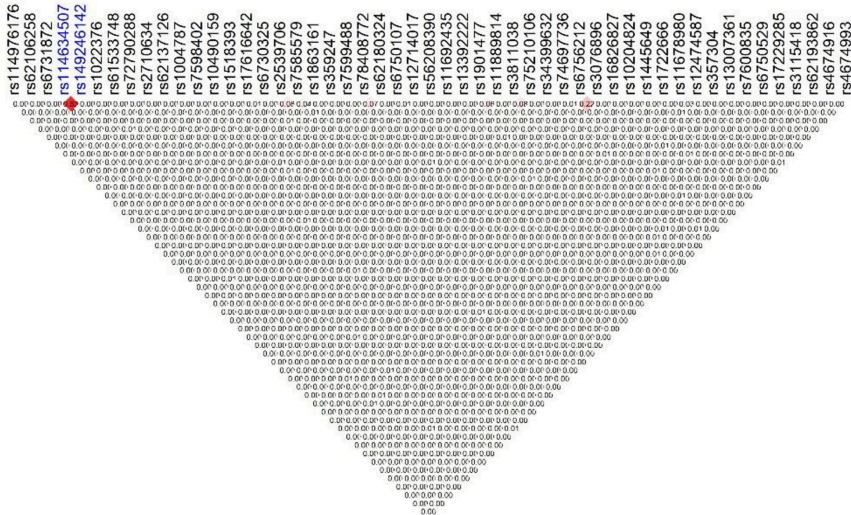

Chromosome 4

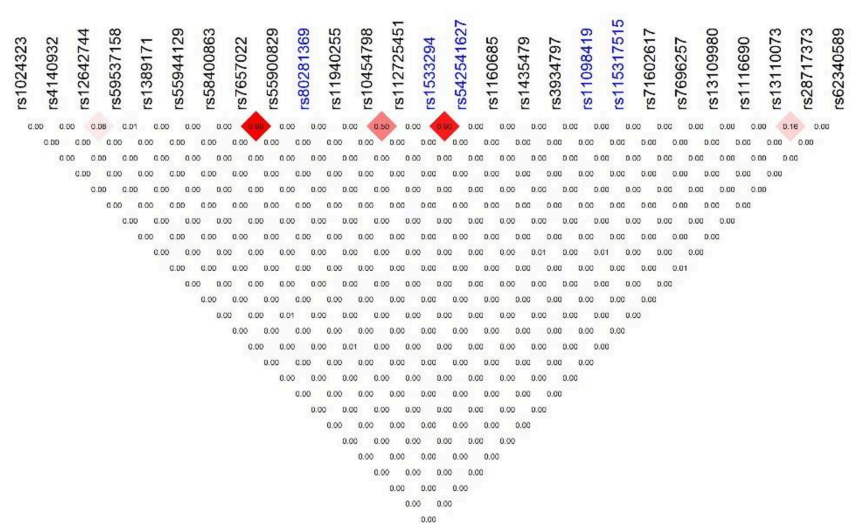

Chromosome 7

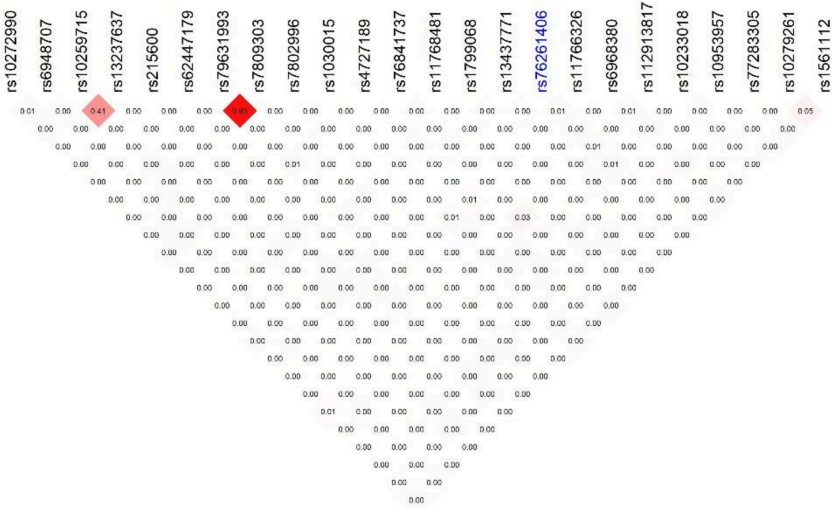

Chromosome 9

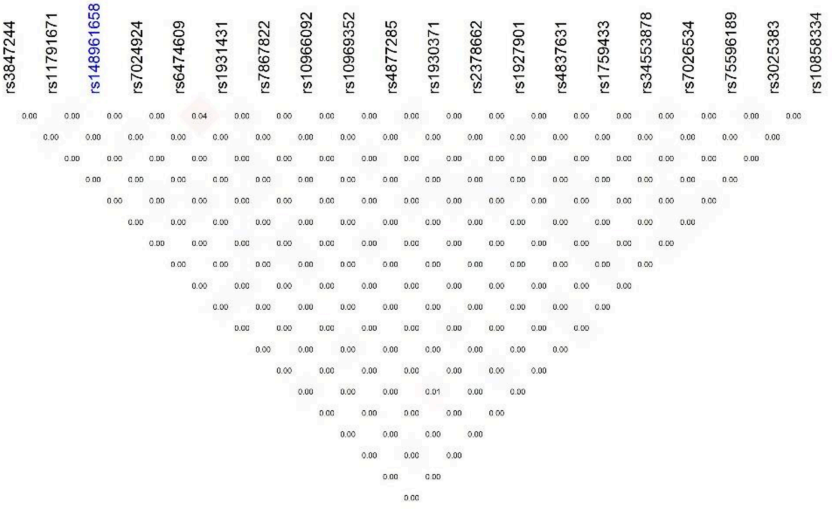

Chromosome 11

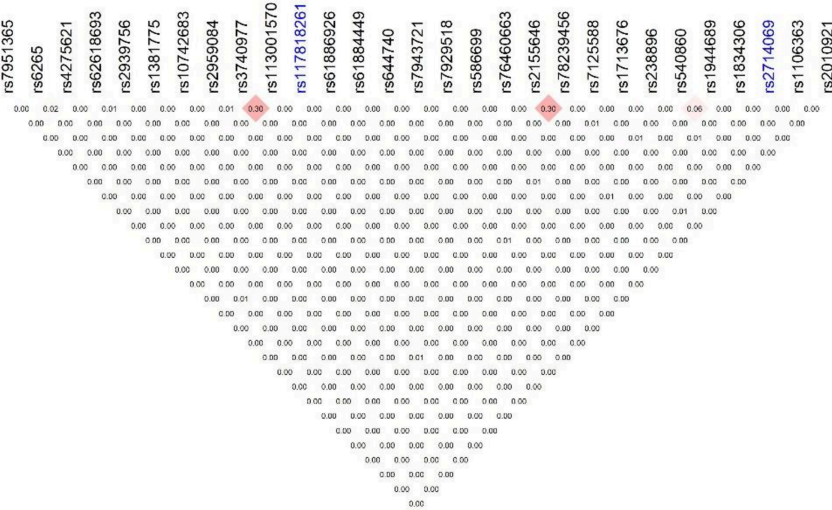

Chromosome 12

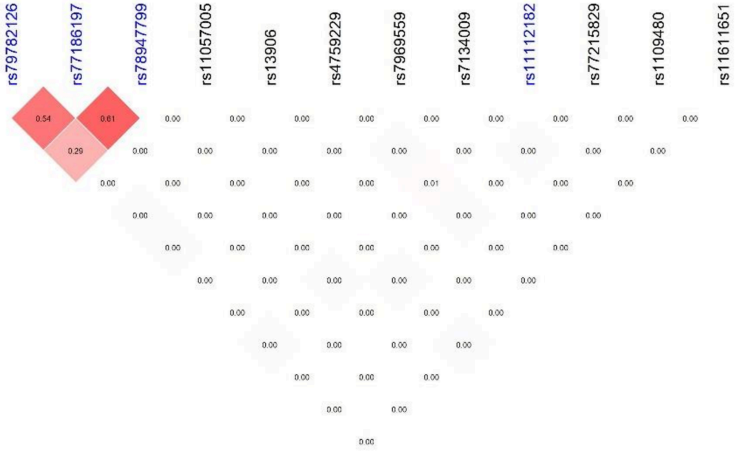



Chromosome 16

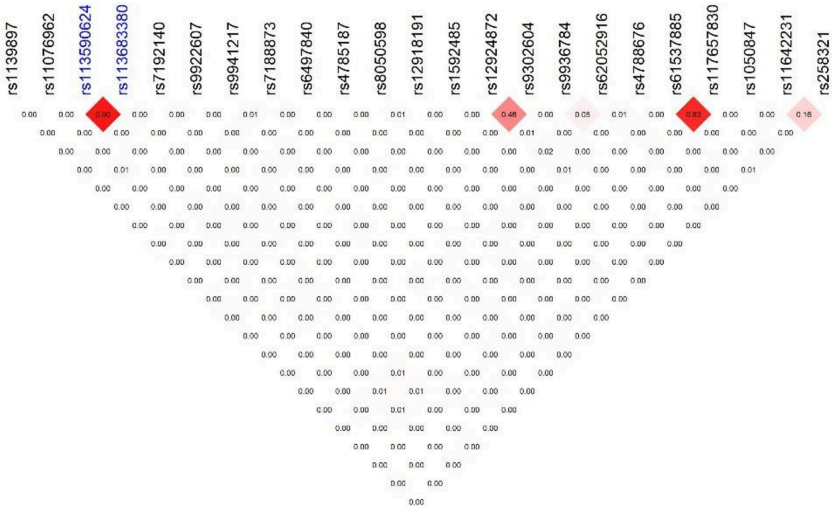

Chromosome 17

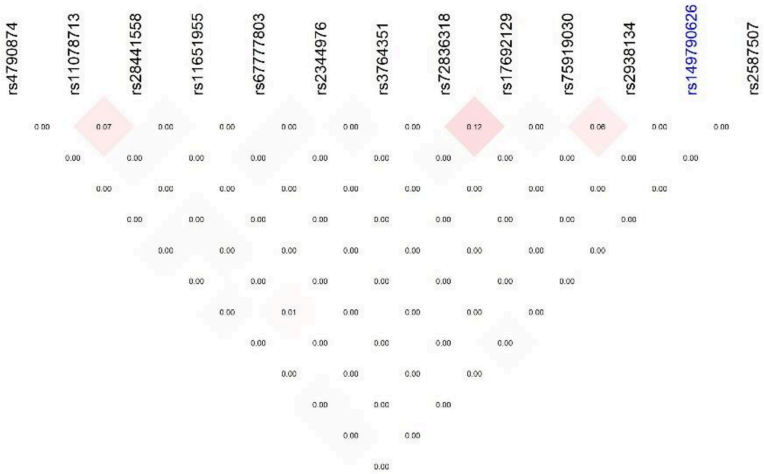

Chromosome 18

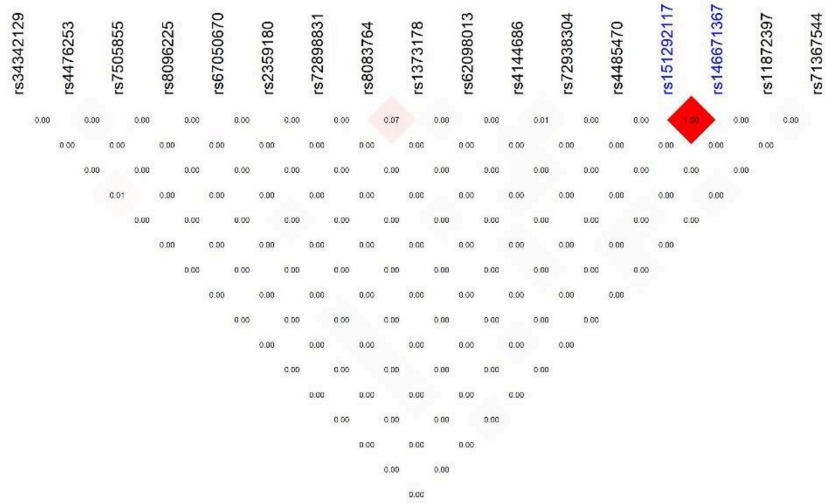

Chromosome 19

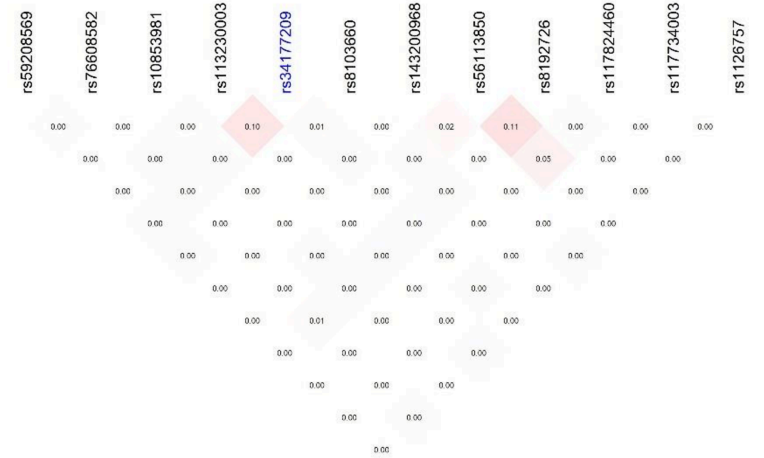

— Literature  
— COBLAnCE
